# Supplementary material for: Maternal MicroRNA Profile Changes When LH Is Added to the Ovarian Stimulation Protocol: A Pilot Study
Source: MDPI journal article supplement (doi:10.3390/epigenomes7040025), 2023-10-06
Supplement: s1 [file s1]

# Supplementary Materials

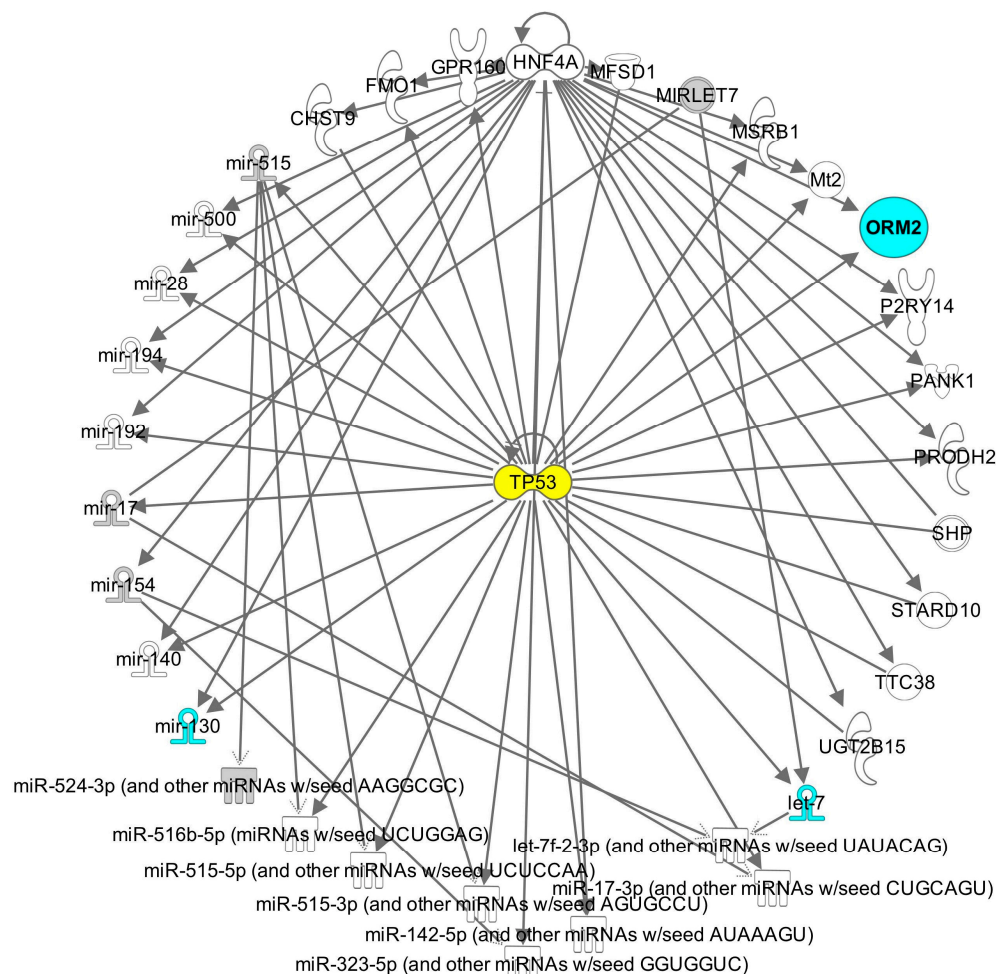

Figure S1. IPA target network analysis of direct relationships between the eight microRNAs, solely characterized in the oocytes of the rFSH group, and other genes or small non-coding RNAs detected in the same pathway.

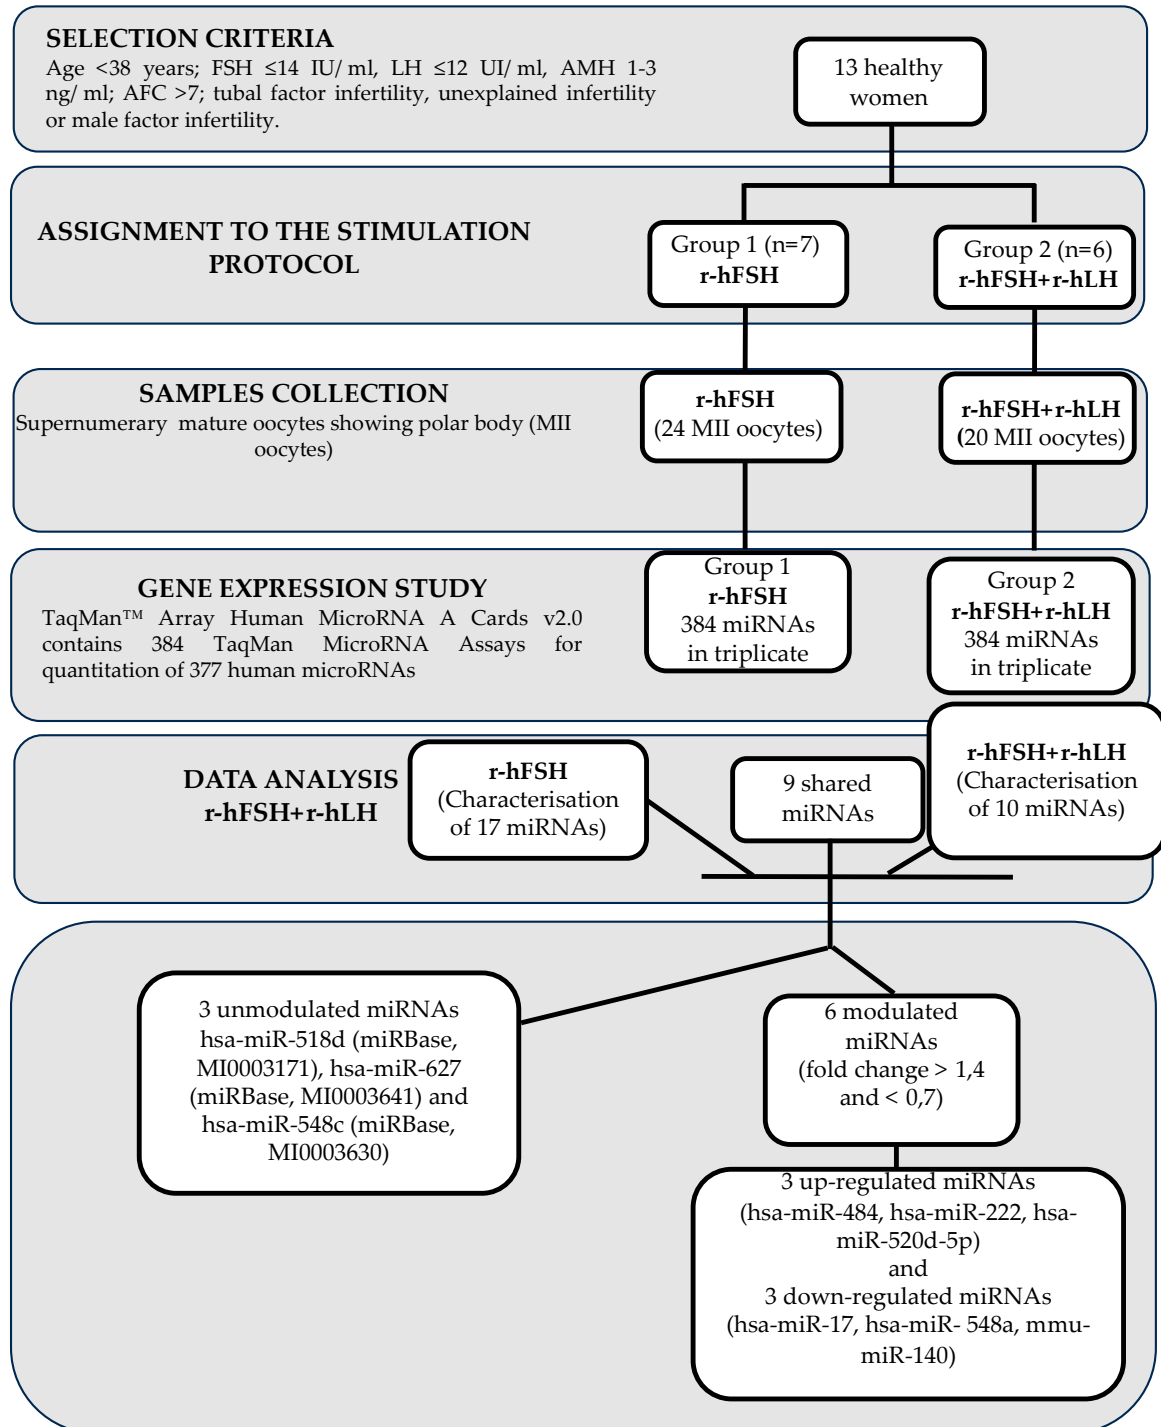

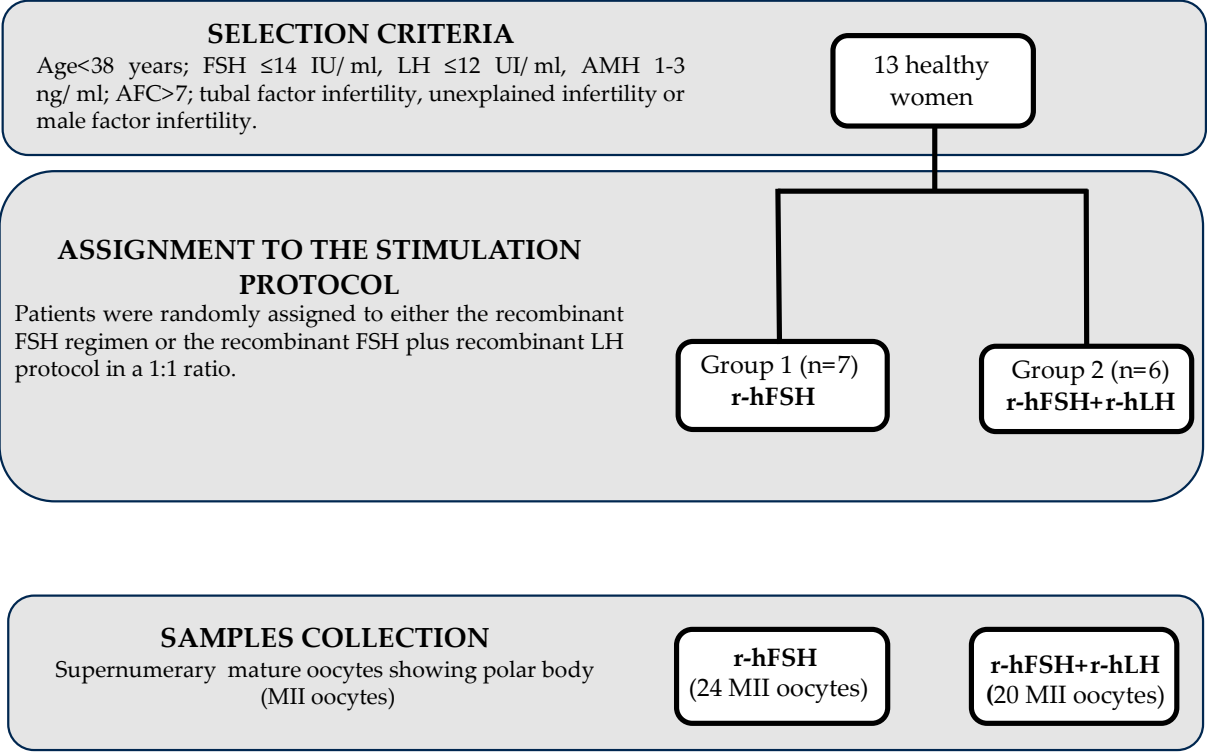

Figure S2. Flowchart describing the patient recruitment, sample collection and overall experimental process followed.
